# Supplementary material
Source: publisher figshare collection journal article supplement (https://karger.figshare.com/ndownloader/files/24618827)
Supplement: Supplementary file 1 [file 24618827]

**Supplementary Table 3 The regulatory interaction between differentially expressed miRNAs and targeted differentially expressed mRNAs in ischemic stroke**

| **MiRNA** | **Up/down** | **Count** | **Targets mRNA** |
| --- | --- | --- | --- |
| hsa-miR-1263 | up | 1 | PTCD2, |
|  |  |  |  |
| hsa-miR-206 | down | 5 | CLEC4D,HMGCR,ITPRIP,MXD1,PICALM, |
|  |  |  |  |
| hsa-miR-302a-3p | down | 6 | CRISPLD2, hsa-miR-548as-3p,MXD1,PHF2,RASSF2,TRIB1, |
|  |  |  |  |
| hsa-miR-3127-5p | down | 4 | MXD1,NDST1,RFX2,ZMIZ1, |
|  |  |  |  |
| hsa-miR-3145-3p | down | 9 | ANTXR2,CREBBP,CTSS,ITPRIP,METTL9,PLXDC2,STXBP5,TRIB1,ZMIZ1, |
|  |  |  |  |
| hsa-miR-3146 | down | 1 | REPS2, |
|  |  |  |  |
| hsa-miR-3156-3p | down | 1 | ANTXR2, |
|  |  |  |  |
| hsa-miR-3171 | down | 4 | PICALM,RASSF2,RFX2,STXBP5, |
|  |  |  |  |
| hsa-miR-3591-5p | down | 1 | STXBP5, |
|  |  |  |  |
| hsa-miR-3622b-5p | up | 5 | ARHGEF19,KLF12,NHP2L1,PTCD2,ZFP3, |
|  |  |  |  |
| hsa-miR-3673 | down | 6 | MTPN,MXD1,NCOA1,NDEL1,SAT1,SDCBP, |
|  |  |  |  |
| hsa-miR-4262 | up | 1 | TMEM194A, |
| hsa-miR-4491 | up | 1 | TMEM97, |
|  |  |  |  |
| hsa-miR-4503 | down | 2 | HMGCR,STXBP5, |
|  |  |  |  |
| hsa-miR-4765 | down | 1 | CREBBP, |
|  |  |  |  |
| hsa-miR-488-3p | down | 5 | CREBBP,IER2,MTPN,MXD1,REPS2, |
|  |  |  |  |
| hsa-miR-5089-5p | up | 1 | TMEM134, |
|  |  |  |  |
| hsa-miR-548as-3p | down | 9 | ANTXR2,CREBBP,ETS2,JMJD1C,NDST1,NUMB,PTEN,RASSF2,STXBP5, |
|  |  |  |  |
| hsa-miR-548k | up | 4 | DFFB,HEATR1,HMG20A,KLF12, |
